# Supplementary material for: The bailiff and the debtor : elements in decision-making and debt collection.
Source: Royal Society of Chemistry journal article supplement (doi:10.1039/c5an00968e), 1973-01-01
Supplement: c5an00968e1.pdf [file c5an00968e1.pdf]

## Supporting Information

### **Label-Free Cyclic Assembly of G-quadruplex Nanowires for Cascade Amplification Detection of T4 Polynucleotide Kinase Activity and Inhibition**

Zhilu Shi, Xiafei Zhang, Rui Cheng, Baoxin Li and Yan Jin\*

Key Laboratory of Applied Surface and Colloid Chemistry, Ministry of Education,  
Key Laboratory of Analytical Chemistry for Life Science of Shaanxi Province, School  
of Chemistry and Chemical Engineering, Shaanxi Normal University, Xi'an 710119,  
China

\* To whom correspondence should be addressed. Tel: 86-29-81530726; Fax: 86-29-81530727; Email: [jinyan@snnu.edu.cn](mailto:jinyan@snnu.edu.cn)

Figure S1.

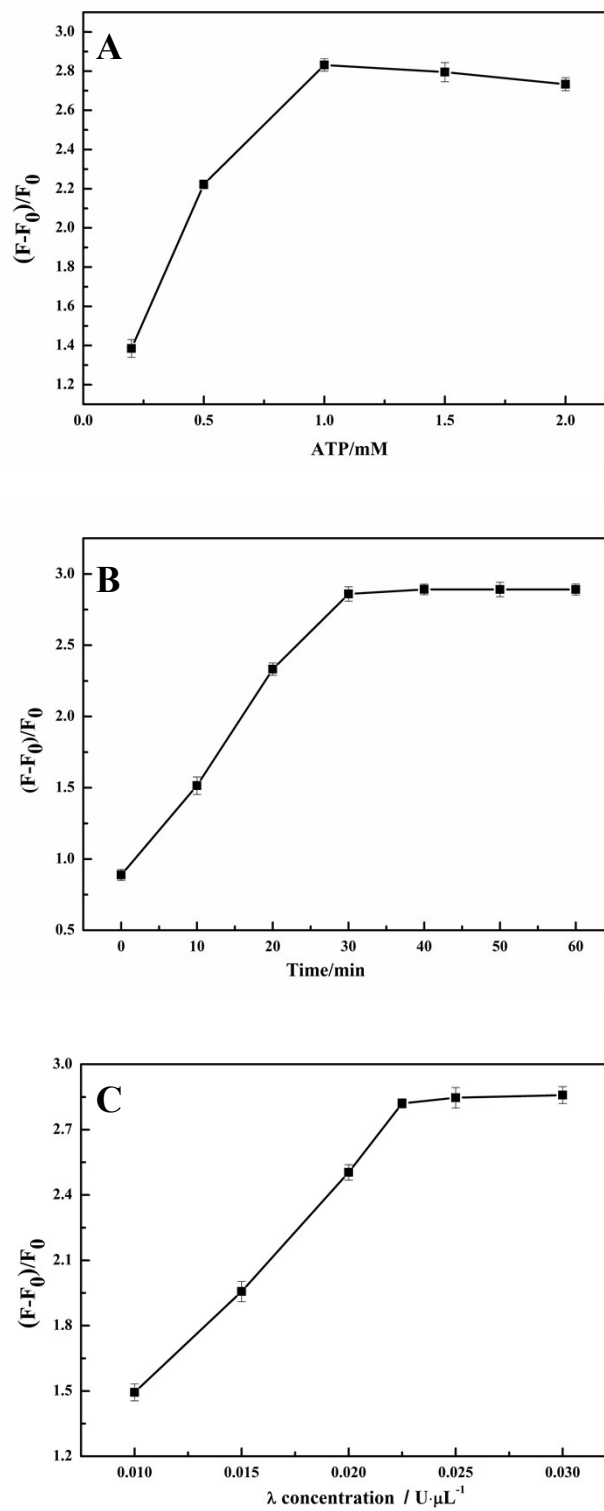

Figure S1. (A) ATP effect of the phosphorylation. (B) The effect of the phosphorylation time. (C) The effect of the  $\lambda$  exo concentration on the assay.

Figure S2.

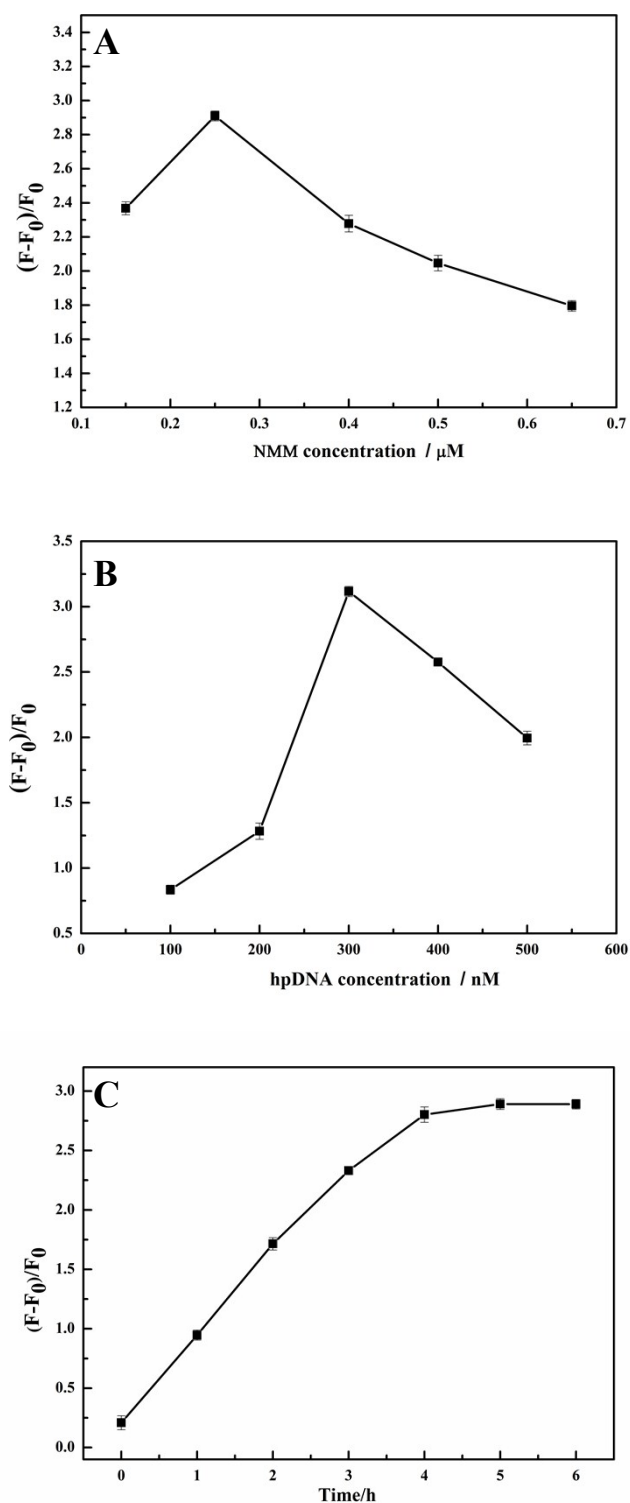

Figure S2. Effect of factors on the amplification efficiency. (A) Fluorescence efficiency with the concentration of the NMM. (B) Dependence of H2, H3 concentration on the fluorescence efficiency. (C) Dependence of fluorescence enhancement on the reacting time.

**Figure S3.**

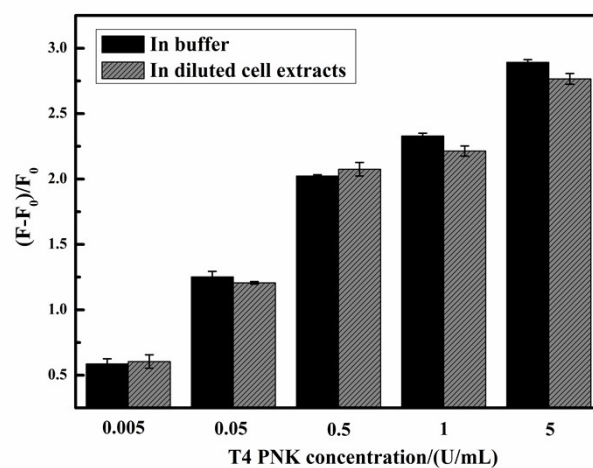

Figure S3. Fluorescence response for detecting T4 PNK activity in pure buffer and diluted cell extracts (1%) respectively. Error bars were calculated from four replicate measurements.

Figure S4.

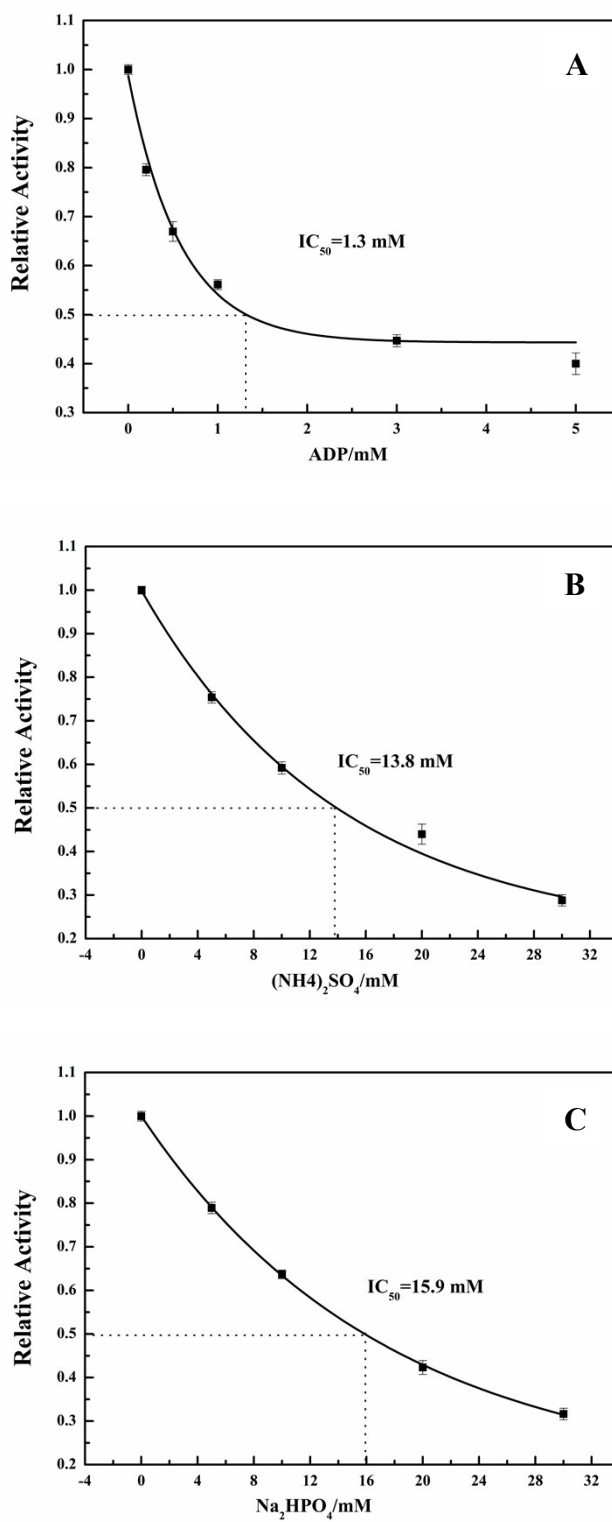

Figure S4. Inhibition effects of (A) ADP, (B)  $(NH_4)_2SO_4$ , and (C)  $Na_2HPO_4$  on phosphorylation.

**Table S1 Comparison of different assays for T4 PNK activity detection**

| Signal readout       | Label-free | Amplification | LOD <sup>a</sup><br>(U/mL) | Linear range<br>(U/mL) | Selectivity | b  |
|----------------------|------------|---------------|----------------------------|------------------------|-------------|----|
| Fluorescence         | —          | —             | 0.02                       | 0-0.25                 | Good        | 1  |
| Fluorescence         | +          | —             | 0.001                      | 0.001-5                | Good        | 2  |
| Fluorescence         | —          | +             | 0.000004                   | 0.00001 -<br>0.001     | Good        | 3  |
| Fluorescence         | +          | +             | 0.043                      | 0-2.7                  | Good        | 4  |
| Fluorescence         | —          | +             | 0.003                      | 0-0.2                  | Good        | 5  |
| Photoelectrochemical | +          | +             | 0.001                      | 0.002-0.1              | Not given   | 6  |
| Fluorescence         | —          | +             | 0.001                      | 0.1-1.0                | Not given   | 7  |
| Colorimetric         | +          | —             | Not given                  | 0.0385-1.3533          | Not given   | 8  |
| Luminescence         | +          | +             | 0.0018                     | 0.002-0.05             | Good        | 9  |
| fluorescence         | —          | +             | 0.005                      | 0.005-0.2              | Not given   | 10 |
| luminescence         | +          | —             | 0.05                       | 0.05-1.0               | Good        | 11 |
| fluorescence         | —          | +             | 0.001                      | 0.001-0.05             | Good        | 12 |
| electrochemistry     | —          | +             | 0.02                       | 0.05-10.0              | Not given   | 13 |
| Fluorescence         | —          | +             | 0.01                       | 0.01-1.0               | Good        | 14 |
| Fluorescence         | +          | +             | 0.0001                     | 0.0005-1.0             | Good        | 15 |
| Fluorescence         | —          | +             | 0.00037                    | 0.001-5                | Good        | c  |

<sup>a</sup> LOD, limit of detection, b reference, c this work.

- 1 C. X. Song, X. H. Yang, K. M. Wang, Q. Wang, J. B. Liu, J. H. L. L He, P. L. Z. H. Qing and Wei Liu, *Chem. Commun.*, 2015, **51**, 1815.
- 2 S. Lian, C. H. Liu, X. B. Zhang, H. H. Wang and Z. P. Li, *Biosens. Bioelectron.*, 2015, **66**, 316.
- 3 Y. C. Z, C. H. Liu, S. J. Sun, Y. L. Tang and Z. P. Li, *Chem. Commun.*, 2015, **51**, 5832.
- 4 Y. H. Guo, Q. L. Wang, Z. L. Wang, X. Chen, L. J. Xu, J. M. Hu and R. J. Pei, *Sens. Actuators, B.*, 2015, **214**, 50.

- 5 N. N. Sun, R. M. Kong, F. L. Qu, X. B. Zhang, S. F. Zhang and J. M. You, *Analyst.*, 2015, **140**, 1827.
- 6 J. Y. Zhuang, W. Q. Lai, M. D. Xu, Q. Zhou and D. P. Tang, *ACS Appl. Mater. Interfaces.*, 2015, **7**, 8330.
- 7 T. Hou, X. Z. Wang, X. J. Liu, T. T. Lu, S. F. Liu and F. Li, *Anal. Chem.*, 2014, **86**, 884.
- 8 J. J. Cheng, Y. Sun, L. Zhou, K. C. Zhang, J. Wang, Z. Y. Wu and R. J. Pei, *Adv.*, 2014, **4**, 56731.
- 9 H. X. Jiang, D. M. Kong and H. X. Shen, *Biosens. Bioelectron.*, 2014, **55**, 133.
- 10 S. F. Liu, J. J. Ming, Y. Lin, C. F. Wang, T. Liu, C. B. Cheng and F. Li, *Sens. Actuators, B.*, 2014, **192**, 157.
- 11 H.-Z. He, K.-H. Leung, W. Wang, D. S.-H. Chan, C.-H. Leung and D.-L. Ma, *Chem. Commun.*, 2014, **50**, 5313.
- 12 S. F. Liu, J. J. Ming, Y. Lin, C. F. Wang, C. B. Cheng, T. Liu and L. Wang, *Biosens. Bioelectron.*, 2014, **55**, 225.
- 13 T. Hou, X. Z. Wang, X. L. Liu, C. Pan and F. Lia, *Sens. Actuators, B.*, 2014, **202**, 588.
- 14 Z.-M. Zhu, R.-Q. Yu and X. Chu, *Anal. Methods.*, 2014, **6**, 6009.
- 15 M. J. Tao, J. Zhang, Y. Jin, B. X. Li, *Anal. Biochem.*, 2014, **464**, 63.
